# Supplementary material
Source: publisher figshare collection journal article supplement (https://tandf.figshare.com/articles/dataset/_/6229301)

*In: Pohe et al. 2018. Distribution, nymphal habitat, genetic structure and conservation of the New Zealand mayfly *Isothraulus abditus* (Insecta: Ephemeroptera) and a description of its subimago. New Zealand Journal of Zoology.*

**Supplementary Figure S1.**

**A.** Image of the subimago male of *Isothraulus abditus*.

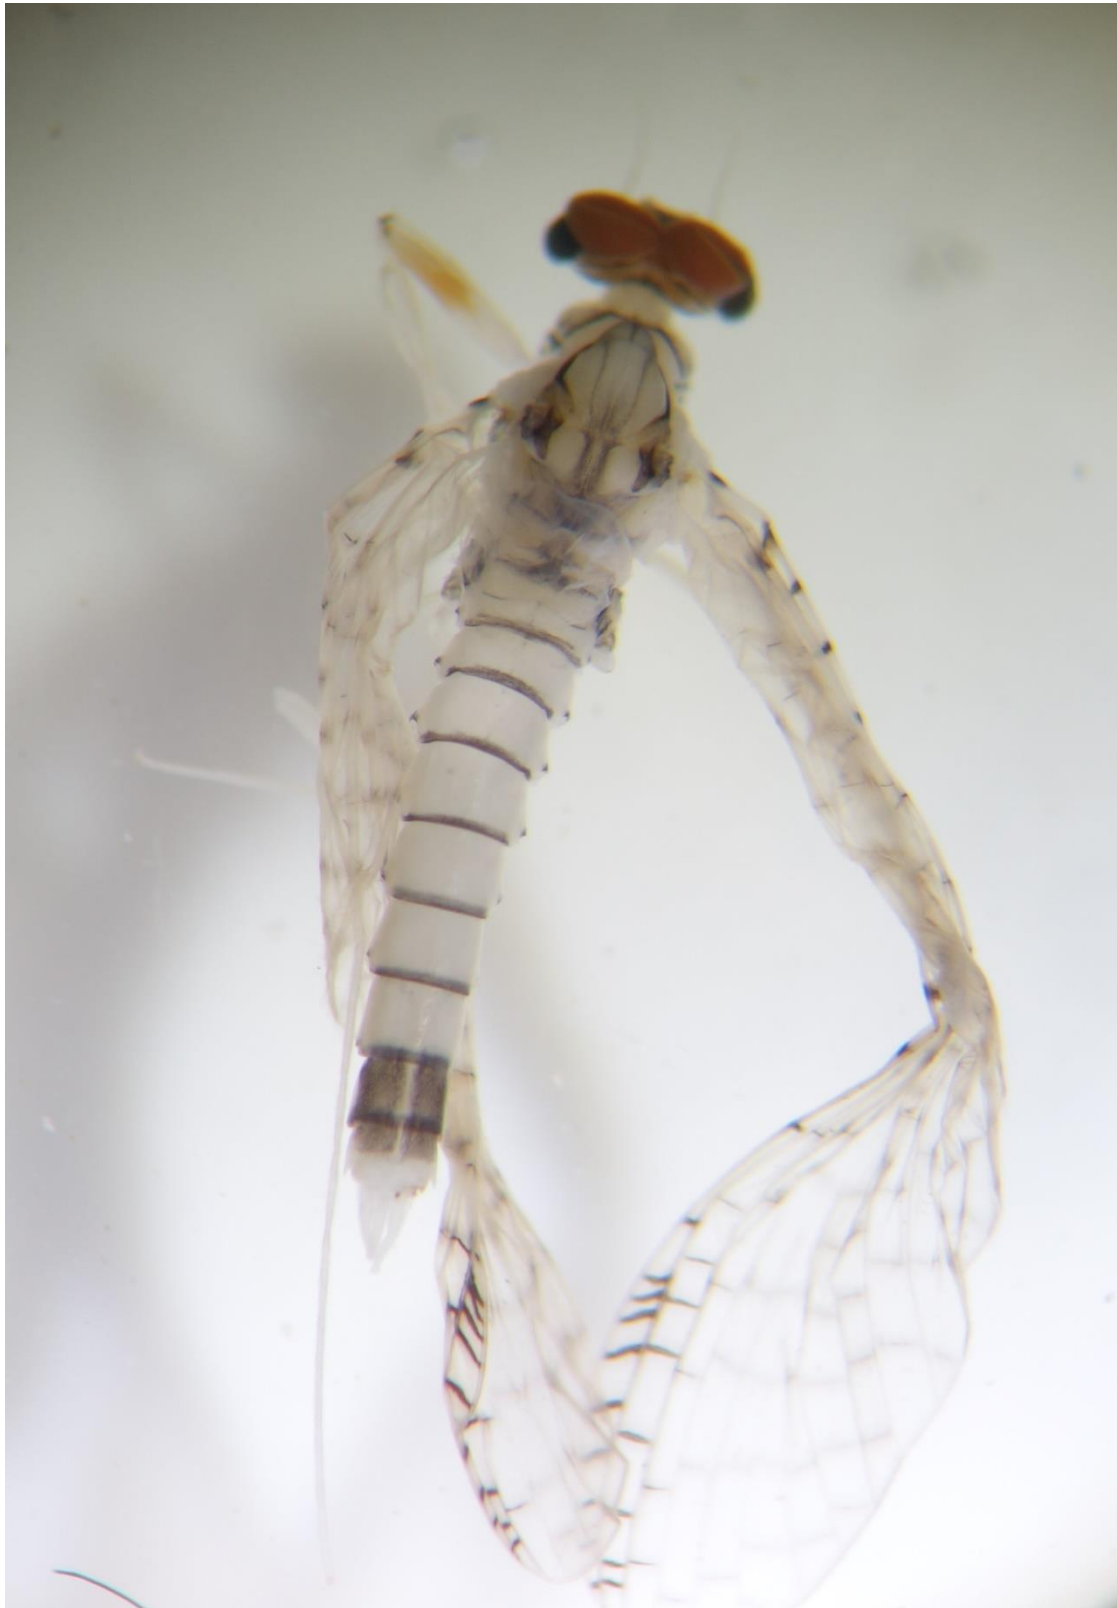

**B.** Image of the subimago female of *Isothraulus abditus*.

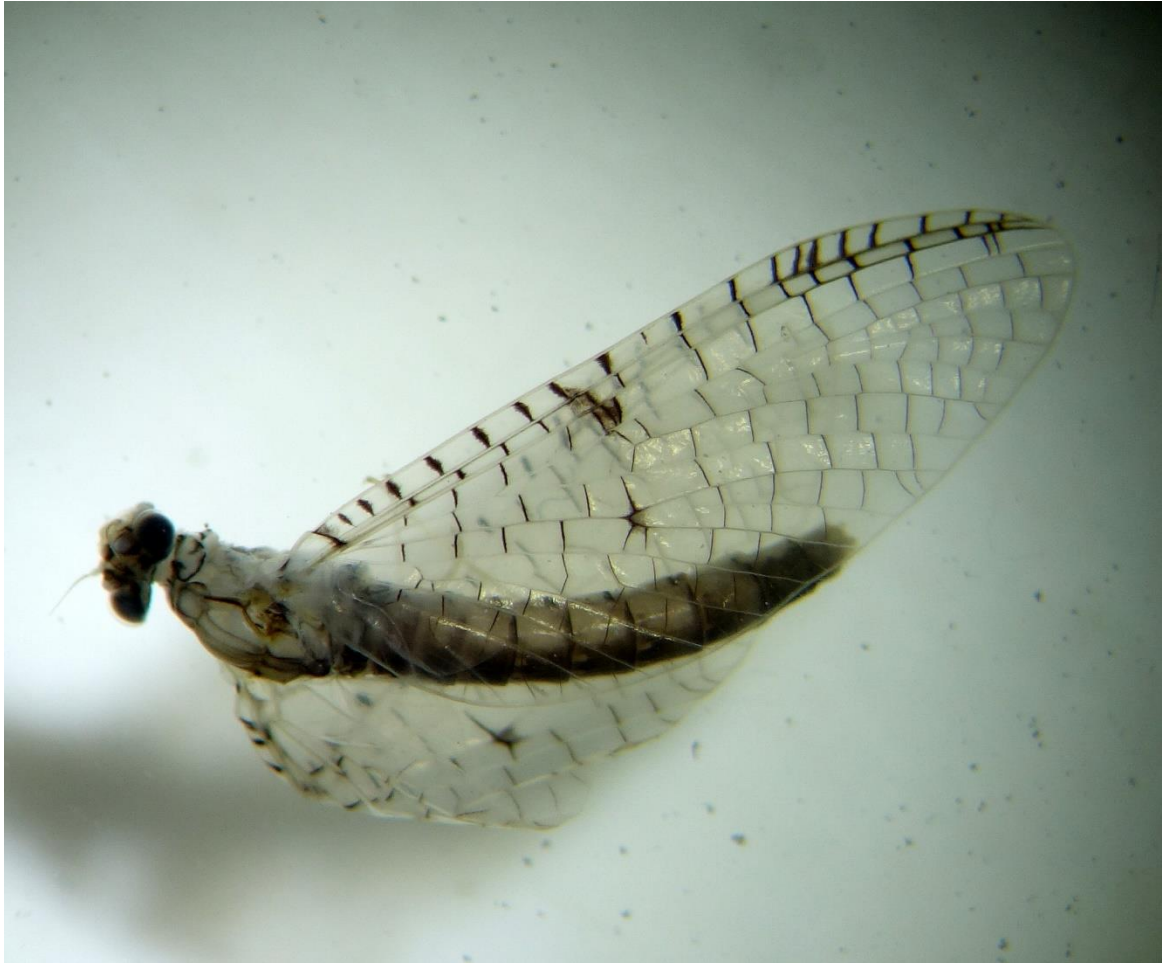

Supplement: Supplementary file 1 [file 1]
