# Supplementary material
Source: publisher figshare collection journal article supplement (https://tandf.figshare.com/articles/dataset/_/6229301)
Supplement: Supplementary file 2 [file 1]

**In: Pohe et al. 2018. Distribution, nymphal habitat, genetic structure and conservation of the New Zealand mayfly *Isothraulus abditus* (Insecta: Ephemeroptera) and a description of its subimago. New Zealand Journal of Zoology.**

**Supplementary Table S2.** Summary of physico-chemical data obtained in the habitat experiment on the Mangere Stream. CV = coefficient of variation (SD/Mean).

|                   | Temperature<br>(°C) | Conductivity<br>(µS/cm) | Dissolved Oxygen<br>(mg/L) | pH      |
|-------------------|---------------------|-------------------------|----------------------------|---------|
| <b>Riffles</b>    |                     |                         |                            |         |
| <i>n</i> =        | 30                  | 30                      | 30                         | 30      |
| Mean              | 11.2                | 83                      | 10.2                       | 7.0     |
| SEM               | 0.01                | 0.06                    | 0.03                       | 0.01    |
| CV%               | 0.56                | 0.36                    | 1.38                       | 0.48    |
| Range             | 11.1–11.4           | 83–84                   | 10.0–10.4                  | 6.9–7.1 |
| <b>Pools</b>      |                     |                         |                            |         |
| <i>n</i> =        | 30                  | 30                      | 30                         | 30      |
| Mean              | 9.8                 | 81                      | 9.4                        | 7.1     |
| SEM               | 0.06                | 0.08                    | 0.07                       | 0.01    |
| CV%               | 3.28                | 0.56                    | 4.19                       | 1.12    |
| Range             | 9.2–10.2            | 80–82                   | 8.5–10.0                   | 7.0–7.3 |
| <b>Backwaters</b> |                     |                         |                            |         |
| <i>n</i> =        | 30                  | 30                      | 30                         | 30      |
| Mean              | 10.8                | 84                      | 8.2                        | 6.9     |
| SEM               | 0.04                | 1.6                     | 0.4                        | 0.07    |
| CV%               | 2.08                | 10.6                    | 24.9                       | 5.2     |
| Range             | 10.4–11.1           | 69–123                  | 1.7–9.9                    | 5.3–7.2 |
